# Supplementary material for: A Validated Multiscale In-Silico Model for Mechano-sensitive Tumour Angiogenesis and Growth
Source: PubMed Central journal article supplement (PMC5268362; doi:10.1371/journal.pcbi.1005259), 2017-01-26
Supplement: pcbi.1005259.s024.pdf [file pcbi.1005259.s024.pdf]

## SUPPORTING INFORMATION

### A Validated Multiscale In-silico Model for Mechano-sensitive Tumour Angiogenesis and Growth

Vasileios Vavourakis, Peter A. Wijeratne, Rebecca Shipley, Marilena Loizidou, Triantafyllos Stylianopoulos, David J. Hawkes

#### Fluid mechanics model parameters

List of model parameters associated with the *Fluid Solver Module* (see Fig 3). Cells marked with an asterisk denote shared values for both tissue types.

| Parameter                                   | Description                                | Host       | Tumour     | Source                       |
|---------------------------------------------|--------------------------------------------|------------|------------|------------------------------|
| [mm-Hg]                                     | Inlet: prescribed pressure                 | 25.        | *          | [1]                          |
| [mm-Hg]                                     | Outlet: prescribed pressure                | 10.        | *          | [1]                          |
| $\mu_B$ [mm-Hg s]                           | blood viscosity                            | $3.e-5$    | *          | [2]                          |
| $S_{vsc}$ [ $cm^{-1}$ ]                     | vascular density                           | 70.        | 200.       | [3–5]                        |
| $K_{int-\{T H\}}$ [ $cm^2(mm-Hg\ s)^{-1}$ ] | hydraulic conductivity of the interstitium | $8.51e-9$  | $2.5e-7$   | [6–8]                        |
| $\gamma_P$ [-]                              | blood vessel wall pores fraction           | $1.296e-5$ | $1.008e-2$ | from [9] and adapted [10,11] |
| $\sigma_o$ [-]                              | average osmotic reflection coefficient     | 0.91       | $8.7e-5$   | [11–13]                      |
| $\pi_{vsc}$ [mm-Hg]                         | plasma osmotic pressure                    | 20.        | 19.3       | [11, 14]                     |
| $\pi_{int}$ [mm-Hg]                         | interstitial fluid osmotic pressure        | 10.        | 17.3       | [10, 11]                     |

#### References

1. Wu J, Xu S, Long Q, Collins MW, König CS, Zhao G, et al. Coupled modeling of blood perfusion in intravascular, interstitial spaces in tumor microvasculature. *Journal of Biomechanics*. 2008;41(5):996–1004.
2. Fung YC. *Biomechanics: Motion, Flow, Stress and Growth*. New York, NY: Springer; 1990.
3. Hilmas DE, Gillette EL. Morphometric analyses of the microvasculature of tumors during growth and after X-irradiation. *Cancer*. 1974;33(1):103–110.
4. Jain RK. Transport of molecules across tumor vasculature. *Cancer Metastasis Rev*. 1987b;6:559–594.
5. Soltani M, Chen P. Numerical Modeling of Fluid Flow in Solid Tumors. *PLoS ONE*. 2011;6(6):e20344.
6. Swabb EA, Wei J, Gullino PM. Diffusion and Convection in Normal and Neoplastic Tissues. *Cancer Research*. 1974;34(10):2814–2822.

- 
7. Jain RK. Transport of molecules in the tumor interstitium: A review. *Cancer Research*. 1987a;47:3039–3051.
  8. Netti PA, Berk DA, Swartz MA, Grodzinsky AJ, Jain RK. Role of Extracellular Matrix Assembly in Interstitial Transport in Solid Tumors. *Cancer Research*. 2000;60(9):2497–2503.
  9. Rippe B, Kamiya A, Folkow B. Simultaneous measurements of capillary diffusion and filtration exchange during shifts in filtration-absorption and at graded alterations in the capillary permeability surface area product (PS). *Acta Physiologica Scandinavica*. 1978;104(3):318–336.
  10. Baxter LT, Jain RK. Transport of fluid and macromolecules in tumors. I. Role of interstitial pressure and convection. *Microvascular Research*. 1989;37(1):77–104.
  11. Jain RK, Tong RT, Munn LL. Effect of vascular normalization by antiangiogenic therapy on interstitial hypertension, peritumor edema, and lymphatic metastasis: Insights from a mathematical model. *Cancer Research*. 2007;67(6):2729–2735.
  12. Ballard K, Perl W. Osmotic reflection coefficients of canine subcutaneous adipose tissue endothelium. *Microvascular Research*. 1978;16(2):224–236.
  13. Curry FE. *Handbook of Physiology, Section 2: The Cardiovascular System*. Bethesda, MD: American Physiological Society; 1984. p. 309–374.
  14. Brace RA, Guyton AC. Interaction of transcapillary Starling forces in the isolated dog forelimb. *American Journal of Physiology - Heart and Circulatory Physiology*. 1977;233(1):H136–H140.
